# Supplementary material for: “Donor milk banking: Improving the future”. A survey on the operation of the European donor human milk banks
Source: PubMed Central journal article supplement (PMC8376009; doi:10.1371/journal.pone.0256435), 2021-08-19
Supplement: pone.0256435.s001.pdf [file pone.0256435.s001.pdf]

**S1 File. Human milk banks contacted and response rate.**

| <b>Country</b> | <b>Number of contacted HMBs</b> | <b>Completed responses</b> | <b>Response rate per country</b> | <b>Responses per country/Total responses</b> |
|----------------|---------------------------------|----------------------------|----------------------------------|----------------------------------------------|
| France         | 34                              | 22                         | 65%                              | 18%                                          |
| Italy          | 38                              | 15                         | 39%                              | 12%                                          |
| Germany        | 22                              | 14                         | 64%                              | 11%                                          |
| Spain          | 15                              | 14                         | 93%                              | 11%                                          |
| Poland         | 16                              | 13                         | 81%                              | 11%                                          |
| Norway         | 12                              | 10                         | 83%                              | 8%                                           |
| Sweden         | 28                              | 8                          | 29%                              | 7%                                           |
| United Kingdom | 16                              | 7                          | 44%                              | 6%                                           |
| Austria        | 5                               | 2                          | 40%                              | 2%                                           |
| Belgium        | 4                               | 2                          | 50%                              | 2%                                           |
| Greece         | 2                               | 2                          | 100%                             | 2%                                           |
| Russia         | 3                               | 3                          | 100%                             | 2%                                           |
| Switzerland    | 7                               | 2                          | 29%                              | 2%                                           |
| Bulgaria       | 1                               | 1                          | 100%                             | 1%                                           |
| Lithuania      | 2                               | 1                          | 50%                              | 1%                                           |
| Netherlands    | 1                               | 1                          | 100%                             | 1%                                           |
| Estonia        | 1                               | 1                          | 100%                             | 1%                                           |
| Finland        | 1                               | 1                          | 100%                             | 1%                                           |
| Portugal       | 1                               | 1                          | 100%                             | 1%                                           |
| Denmark        | 2                               | 1                          | 50%                              | 1%                                           |
| Romania        | 1                               | 1                          | 100%                             | 1%                                           |
| Serbia         | 1                               | 1                          | 100%                             | 1%                                           |
| Croatia        | 1                               | 0                          | 0%                               | 0%                                           |
| Czech Republic | 1                               | 0                          | 0%                               | 0%                                           |
| <b>Total</b>   | <b>215</b>                      | <b>123</b>                 |                                  |                                              |
