# Supplementary material for: “Donor milk banking: Improving the future”. A survey on the operation of the European donor human milk banks
Source: PubMed Central journal article supplement (PMC8376009; doi:10.1371/journal.pone.0256435), 2021-08-19
Supplement: pone.0256435.s003.pdf [file pone.0256435.s003.pdf]

**S3 File. Postnatal week onwards that the donors are allowed to donate, and the maximum duration of donation.**

|                          | <b>Responses</b>                    | <b>n (%)</b> |         |
|--------------------------|-------------------------------------|--------------|---------|
| <b>Start of donation</b> | From birth onwards                  | 92 (75)      |         |
|                          | 2-4 weeks                           | 21 (17)      |         |
|                          | ≥ a month                           | 7 (6)        |         |
|                          | Other                               | 3 (2)        |         |
| <b>Donation</b>          | Not specified                       | 44 (36)      |         |
|                          | 3 months                            | 11 (9)       |         |
|                          | 4-5 months                          | 2 (3)        |         |
|                          | <b>Maximum duration of donation</b> | 6 months     | 32 (26) |
|                          |                                     | >6-8 months  | 4 (3)   |
|                          |                                     | 9 months     | 3 (2)   |
|                          |                                     | 12 months    | 19 (15) |
|                          |                                     | Other        | 7 (6)   |
