# Supplementary material for: “Donor milk banking: Improving the future”. A survey on the operation of the European donor human milk banks
Source: PubMed Central journal article supplement (PMC8376009; doi:10.1371/journal.pone.0256435), 2021-08-19
Supplement: pone.0256435.s004.pdf [file pone.0256435.s004.pdf]

**S4 File. Effect of frozen storage (-20°C and -80°C) on DHM components, before and after pasteurization.**

|                              |                             | No loss                                                                                                                                                                                                                                             | Decreased                                                                                                                                                                                                 | Increased                               |  |
|------------------------------|-----------------------------|-----------------------------------------------------------------------------------------------------------------------------------------------------------------------------------------------------------------------------------------------------|-----------------------------------------------------------------------------------------------------------------------------------------------------------------------------------------------------------|-----------------------------------------|--|
| <b>Before pasteurization</b> | -20°C,<br>1 months          | Lactoferrin <sup>21</sup>                                                                                                                                                                                                                           | Lysozyme, sIgA, Lactoperoxidase <sup>21</sup>                                                                                                                                                             |                                         |  |
|                              | -20°C,<br>3 months          | Lactoferrin, lysozyme, IgG, IgA, C3 <sup>22</sup><br><br>Vitamin E, vitamin C, fatty acids <sup>14</sup><br><br>Bactericidal activity against <i>P.aeruginosa</i> <sup>15</sup><br><br>Lysozyme, Protease, lipase, B vitamins, lipids <sup>12</sup> | Lactoferrin (↓ 37%) <sup>18</sup> , (↓ 55%) <sup>13</sup><br><br>Bactericidal activity against <i>E.coli</i> <sup>15</sup><br><br>Lactoperoxidase activity <sup>12</sup><br><br>Fat content <sup>16</sup> | Dornic Acidity <sup>23</sup>            |  |
|                              | -20°C,<br>5 months          | Vitamin E, vitamin C, fatty acids <sup>14</sup>                                                                                                                                                                                                     |                                                                                                                                                                                                           |                                         |  |
|                              | -20°C,<br>6 months          | IgA, EGF, IL-8, TGF-β2, TGF-β1, TNF-RI, TNF-α, IL-6, IL-10 <sup>17</sup>                                                                                                                                                                            | Lactoferrin (↓ 46%) <sup>18</sup> , (↓ 65%) <sup>18</sup><br><br>Bioactivity of lactoferrin <sup>13</sup>                                                                                                 |                                         |  |
|                              | -20°C,<br>8 months          | Vitamin E, fatty acids <sup>14</sup>                                                                                                                                                                                                                | Vitamin C <sup>14</sup>                                                                                                                                                                                   |                                         |  |
|                              | -20°C,<br>9 months          | Total protein, fat, lactoferrin, sIgA, osmolality <sup>19</sup>                                                                                                                                                                                     |                                                                                                                                                                                                           | Nonesterified fatty acids <sup>14</sup> |  |
|                              | -20°C,<br>12 months         | Vitamin E, fatty acids <sup>14</sup>                                                                                                                                                                                                                |                                                                                                                                                                                                           |                                         |  |
|                              | -80°C,<br>3 months          | Vitamin E <sup>14</sup><br><br>Bactericidal activity against <i>P.aeruginosa</i> , <i>E. coli</i> <sup>15</sup>                                                                                                                                     |                                                                                                                                                                                                           |                                         |  |
|                              | -80°C,<br>5 months          | Vitamin E, vitamin C, fatty acids <sup>14</sup>                                                                                                                                                                                                     |                                                                                                                                                                                                           |                                         |  |
|                              | -80°C,<br>6 months          | IgA, EGF, IL-8, TGF-β2, TGF-β1, TNF-RI, TNF-α, IL-6, IL-10 <sup>17</sup>                                                                                                                                                                            |                                                                                                                                                                                                           |                                         |  |
|                              | -80°C,<br>8 months          | Vitamin E, vitamin C, fatty acids <sup>14</sup>                                                                                                                                                                                                     |                                                                                                                                                                                                           |                                         |  |
|                              | -80°C,<br>12 months         | Vitamin E, fatty acids <sup>14</sup>                                                                                                                                                                                                                | Vitamin C <sup>14</sup><br><br>IgA, IL-8, TGF-β1 <sup>17</sup>                                                                                                                                            |                                         |  |
|                              | <b>After pasteurization</b> | -20°C,<br>3 months                                                                                                                                                                                                                                  | Dornic Acidity <sup>23</sup>                                                                                                                                                                              |                                         |  |
|                              |                             | -20°C,<br>8 months                                                                                                                                                                                                                                  | Macronutrient and energy content <sup>20</sup>                                                                                                                                                            |                                         |  |
