# Supplementary material for: “Donor milk banking: Improving the future”. A survey on the operation of the European donor human milk banks
Source: PubMed Central journal article supplement (PMC8376009; doi:10.1371/journal.pone.0256435), 2021-08-19
Supplement: pone.0256435.s005.pdf [file pone.0256435.s005.pdf]

**S5 File. Published guidelines on storage, thawing, pooling and frequency of bacteriological testing of DHM.**

| Published guidelines                                                                               | Freezing storage duration                                                                                                                                                                                                                                             | Thawing                                                                                                                                                                                                                                                       | Pooling                                                                                                                                                                                                                                   | Frequency of bacteriological screening                                                                                                                                                                                                                                                                                                        |
|----------------------------------------------------------------------------------------------------|-----------------------------------------------------------------------------------------------------------------------------------------------------------------------------------------------------------------------------------------------------------------------|---------------------------------------------------------------------------------------------------------------------------------------------------------------------------------------------------------------------------------------------------------------|-------------------------------------------------------------------------------------------------------------------------------------------------------------------------------------------------------------------------------------------|-----------------------------------------------------------------------------------------------------------------------------------------------------------------------------------------------------------------------------------------------------------------------------------------------------------------------------------------------|
| <p>Recommendations for the creation and operation of maternal milk banks in Spain<sup>26</sup></p> | <p>It is recommended that frozen milk not be kept at home for more than 4 weeks before submitting it to the HMB. Raw milk can be stored in the freezer before pasteurization at -20/-30°C up to 3 months or at -80°C up to 12 months from the date of extraction.</p> | <p>At 4°C prior to pasteurization, although partial thawing in a water bath is also allowed</p>                                                                                                                                                               | <p>HMBs can accept pooled raw milk extracted from a single donor.</p> <p>Depending on the criteria established by each HMB, a mixture of acceptable raw DHM from different donors can be accepted as long as it is later pasteurized.</p> | <p>Before processing, each lot of milk will undergo testing according to the protocols validated by each HMB.</p> <p>The microbiological contents of each lot of milk must be assessed after pasteurization.</p>                                                                                                                              |
| <p>Guidelines for the use of human milk and milk handling in Sweden<sup>25</sup></p>               | <p>Breast milk can be kept in a freezer (at least -20°C) for a maximum of 6 months</p>                                                                                                                                                                                | <p>At room temperature, in a water bath with cold water fresh from the tap. This should take about 2-3 h for 100-200 ml. For larger volumes, defrost overnight in a refrigerator. Defrosted milk can be kept at room temperature for a maximum of 2 hours</p> | <p>Pooling of milk cannot be recommended</p>                                                                                                                                                                                              | <p>During continued milk donation, bacterial testing shall be performed once a month as a donor hygiene check.</p> <p>For further control after pasteurization procedure systematic random sample controls (process control according to standard ISO 2859-1) may be performed, but there are no strong reasons for such a recommendation</p> |
| <p>European Milk Bank Association (EMBA)<sup>1</sup></p>                                           | <p>Not mentioned</p>                                                                                                                                                                                                                                                  | <p>In a refrigerator to prevent its temperature rising above 8°C or if impractical, because of time constraints, on a counter where it can be monitored and</p>                                                                                               | <p>The pooling of DHM from the same donor is acceptable prior to any heat processing</p>                                                                                                                                                  | <p>All pools of milk be tested prior to pasteurization.</p>                                                                                                                                                                                                                                                                                   |

|                                                                                                  |                                                                                                                                                                                                          |                                                                                                                                                                                                |                                                                                                                                                               |                                                                                                                                                                                                                                                                                                                                                                             |
|--------------------------------------------------------------------------------------------------|----------------------------------------------------------------------------------------------------------------------------------------------------------------------------------------------------------|------------------------------------------------------------------------------------------------------------------------------------------------------------------------------------------------|---------------------------------------------------------------------------------------------------------------------------------------------------------------|-----------------------------------------------------------------------------------------------------------------------------------------------------------------------------------------------------------------------------------------------------------------------------------------------------------------------------------------------------------------------------|
|                                                                                                  |                                                                                                                                                                                                          | transferred to a refrigerator immediately once thawed.                                                                                                                                         |                                                                                                                                                               | Each batch of milk be tested after pasteurization                                                                                                                                                                                                                                                                                                                           |
| Guidelines for the establishment and operation of a donor human milk bank (Italy) <sup>4</sup>   | Both fresh and pasteurized milk should be stored in the freezer at a temperature of $-20^{\circ}\text{C}$ . The maximum duration of storage in a freezer should be 6 months after the date of expression | Slowly in the refrigerator for a max period of 24 h, or rapidly in a water bath at a temperature not exceeding $37^{\circ}\text{C}$ , or under running lukewarm water.                         | Pasteurization can be carried out on the milk of a single donor or on a milk pool deriving from a limited number of donors                                    | Pre-pasteurization testing: at the first donation, and when the donor does not seem to guarantee the appropriate hygienic conditions or, in any case, periodically in a random manner<br><br>Post-pasteurization testing: in a regular way (e.g. once a month, or every 10 pasteurization cycles), or when there are concerns about the processing.                         |
| National Institute for Health and Care Excellence (NICE) <sup>5</sup>                            | Store donor milk awaiting pasteurization in the freezer at the milk bank (at $-20^{\circ}\text{C}$ ) for no longer than 3 months from the date of expression.                                            | Before testing and pasteurizing, thoroughly thaw the donor milk, and keep in the refrigerator for no longer than 24 h. Prevent the donor milk from reaching $8^{\circ}\text{C}$ while thawing. | Only pool pre-pasteurized breast milk from the same donor. Do not pool milk from different donors, or batches of pasteurized breast milk from the same donor. | Before pasteurization, test a sample from each batch of pooled donor milk. Regularly test pasteurized donor milk for microbial contamination. Test either at least once a month or every 10 cycles, depending on which comes first and, on an ad-hoc basis if any new processes, equipment or staff are introduced, or if there are concerns about any part of the process. |
| Guidelines for the construction and operation of a donor human milk bank (Austria) <sup>28</sup> | Frozen milk must be delivered to the milk bank within 3 months.<br><br>DHM can stay frozen for up to 6 months at $-18^{\circ}\text{C}$ or colder                                                         | Refrigerator (24 h), under running cold water or with special thawing devices.                                                                                                                 | Donor milk from various donors may be combined                                                                                                                | A sample must be taken before each initial donation and also if there is any suspicion of contamination or non-hygienic handling practices throughout the donation process.                                                                                                                                                                                                 |

|                                                                                                  |                                                                    |                                                                                                                                                                           |                                                                                                                                                                                                                                                                                       |                                                                                                                                                                                                                                                          |
|--------------------------------------------------------------------------------------------------|--------------------------------------------------------------------|---------------------------------------------------------------------------------------------------------------------------------------------------------------------------|---------------------------------------------------------------------------------------------------------------------------------------------------------------------------------------------------------------------------------------------------------------------------------------|----------------------------------------------------------------------------------------------------------------------------------------------------------------------------------------------------------------------------------------------------------|
| <p>Guidelines for the organization of a donor human milk bank (Switzerland)<sup>29</sup></p>     | <p>Not specified</p>                                               | <p>Refrigerator overnight or under running cold to lukewarm water</p>                                                                                                     | <p>Not recommended</p>                                                                                                                                                                                                                                                                | <p>On three consecutive days at the beginning of the donation before pasteurization. As the donation progresses, a bacteriological check is carried out at least once a week. Routine bacteriological control is not necessary after pasteurization.</p> |
| <p>Guidelines for the operation and organization of a donor human milk (Norway)<sup>27</sup></p> | <p>Breast milk can be kept in a freezer (-20°C) up to 6 months</p> | <p>The milk should be thawed in the refrigerator if possible. If there's not enough time, the milk can be thawed in a water bath (cold water) or at room temperature.</p> | <p>If DHM is dispensed raw, a mix from several donors should not be performed. If DHM is pasteurized a pool of usually not more than 5 donors is acceptable (Version 2002).<br/><br/>It is not recommended to mix DHM from different donors before pasteurization (Version 2018).</p> | <p>On first three donations and if the acceptance criteria are not met, testing is repeated for the next two donations. If these donations are rejected, the donation should be terminated</p>                                                           |
